# Supplementary material for: MSX2 safeguards syncytiotrophoblast fate of human trophoblast stem cells
Source: PubMed Central journal article supplement — Proc Natl Acad Sci U S A. 2021 Sep 10;118(37):e2105130118. doi: 10.1073/pnas.2105130118 (PMC8449346; doi:10.1073/pnas.2105130118), 2021-09-10
Supplement: pnas.2105130118.sapp.pdf [file pnas.2105130118.sapp.pdf]

## Supplemental Material

Hornbachner et al.,

MSX2 safeguards syncytiotrophoblast fate of human trophoblast stem cells

### List of Material provided:

- Additional details on Materials & Methods
- Supplemental Fig.S1: Additional evidence that depletion of MSX2 results in loss of silencing of syncytiotrophoblast genes.
- Supplemental Fig.S2: Additional evidence that ectopic expression of MSX2 blocks syncytiotrophoblast cell fate.
- Supplemental Fig.S3: Additional data on MSX2 binding of syncytiotrophoblast genes in hTSC.
- Supplemental Fig.S4: Additional data on MSX2-SWI/SNF complex interaction.
- Supplemental Fig.S5: Additional data showing that MSX2 and cBAF complex co-bind trophoblast genes marked by H3K27ac.
- Supplemental Fig.S6: Additional evidence demonstrating that MSX2 depletion leads to increase in both cBAF occupation and H3K27ac.
- SI References

## Supplementary Information

### Additional details on Materials & Methods

#### Chromatin immunoprecipitation

Cells ( $1-2 \times 10^8$ ) were fixed in 2mM Di(N-succinimidyl) glutarate (DSG) (80424, Sigma) in PBS at room temperature (RT) for 45 min. After washing with PBS, cells were fixed again in 1% formaldehyde (28908, Sigma) in TS base media at RT for 12 min. Fixation was stopped by adding glycine to a final concentration of 0.125 M. Cells were washed twice with PBS and resuspended in wash buffer 1 (10mM Hepes pH7.5, 10mM EDTA, 0.5mM EGTA and 0.75% Triton X-100) and incubated at 4°C for 10min. After pelleting, cells were resuspended in wash buffer 2 (10mM Hepes pH7.5, 200mM NaCl, 1mM EDTA and 0.5mM EGTA) and incubated at 4°C for 10min. After pelleting, cells were lysed in the lysis/sonication buffer (150mM NaCl, 25mM Tris pH 7.5, 5mM EDTA, 0.1% Triton, 1% SDS and 0.5% sodium deoxycholate) with cComplete™ EDTA-free Protease Inhibitor Cocktail (11873580001, Sigma) on ice for 30min. Chromatin was sonicated 15s on /30s off for 23-25 cycles using the UW2070 sonicator (Bandelin) to the average 300-bp fragments. Chromatin was diluted 1/10 with the dilution buffer (150mM NaCl, 25mM Tris pH 7.5, 5mM EDTA, 1% Triton X-100, 0.1% SDS and 0.5 % sodium deoxycholate) containing complete protease inhibitors. Protein G magnetic Dynabeads (10004D, Invitrogen) were blocked with 1mg/ml BSA and tRNA at 4°C for 1h and washed with buffer A (150mM NaCl, 25mM Tris pH 8.0, 1mM EDTA, 1% NP-40, 0.1 % SDS and 0.5 % sodium deoxycholate). Chromatin was pre-cleared with pre-blocked beads at 4°C for 1h. Four hundred micrograms of chromatin and seven micrograms of antibody rabbit anti-MSX2 (HPA005652, Sigma) and rabbit normal IgG (NI01, Sigma) were used per IP. IP was performed overnight at 4°C with rotation. Pre-blocked magnetic beads were added next morning for 7-8 h. Beads were washed at 4°C with buffer A three times, buffer B (50mM Tris pH 8.0, 500mM NaCl, 0.1% SDS, 0.5 % sodium deoxycholate, 1% NP-40 and 1mM EDTA), buffer C (50mM Tris pH 8.0, 250mM LiCl, 0.5% sodium deoxycholate, 1% NP-40 and 1mM EDTA) and rinsed with TE buffer. DNA was eluted from beads in the elution buffer (1% SDS,

0.1M NaHCO<sub>3</sub>). Samples were treated with RNase A and Proteinase K and reverse-crosslinked overnight by incubation for 2h at 37°C, followed by 12h at 65°C. DNA was purified on the PCR purification columns (Qiagen). To generate a library, DNA from 2-4 IPs was pooled and the NEBNext Ultra II DNA library preparation master mix (New England Biolabs, E7645) was used according to the manufacturer's instructions. Libraries were sequenced on an Illumina HiSeq 2500 sequencer with 50-base pair (bp) single-end protocol.

For ARID1A, SMARCA4, H3K27ac, H3K27me3 and H3K9me3 ChIP-seq on WT and MSX2 KD cells, cells were fixed in 1% FA for 10min and fixation was quenched by 0.125 M glycine at RT. Cells were scraped in PBS, centrifuged at 500g for 5min and pellet was resuspended in an ice-cold IP-buffer, a 2:1 mixture of SDS-buffer (100mM NaCl, 50mM Tris-Cl pH 8.0, 5mM EDTA pH 8.0, 0.5% SDS) and Triton-X-buffer (100mM NaCl, 100mM Tris-Cl pH 8.6, 5mM EDTA pH 8.0, 5% Triton X), containing complete Protease inhibitor tabs (11873580001, Sigma). After 30min incubation on ice chromatin was sonicated 15s on (pulsed, with 90% actual sonication time) /30s off for 20 cycles using the UW2070 sonicator (Bandelin) at ~40% power. 30µg and 10µg chromatin (DNA equivalent) were diluted to 500µl and precipitated at 4°C overnight using the antibodies against ARID1A (12354, Cell Signaling), SMARCA4 (ab110641, abcam) and H3K27ac (39685, Active Motif), H3K27me3 (07-442, Merck Millipore), H3K9me3 (07-449, Merck Millipore) respectively. For ChIPs of histone modifications we added 0.8µg Spike-In antibody (61686, Active Motif) and 25ng Spike-In chromatin per ChIP (53083, Active Motif), (1). 50µl Dynabeads Protein G (10004D, Invitrogen) equilibrated in IP-buffer, blocked with 1mg/ml BSA and tRNA at 4°C for 1h and washed with IP-buffer were added to the IP reaction and incubated for 3h at 4°C. ChIPs were washed three times with Low Salt Buffer (50mM HEPES pH 7.5, 140mM NaCl, 1% Triton X), once with High Salt Buffer (50mM HEPES pH 7.5, 500mM NaCl, 1% Triton X) and once with TE buffer before elution with 200µl Elution Buffer (1% SDS, 100mM NaHCO<sub>3</sub>) per reaction. Eluate was separated from the beads and decrosslinked over night at 65°C. After RNaseA and proteinase K treatment 5ng of DNA were subjected to library prep (see above). Libraries were sequenced paired-end 50bp on an Illumina NovaSeq 6000 SP1 flowcell.

## **Bioinformatic analysis**

### RNA quantification, QuantSeq

Libraries generated with the QuantSeq FWD kit (Lexogen) were sequenced on an Illumina HiSeq2500v4 at single read 50bp. Reads were trimmed with Trim Galore! (0.6.5). Quality control was performed using fastQC (0.11.9) (2). Transcripts were mapped to the hg38 human reference genome using STAR (2.7.3a) (3). After indexing with samtools (1.10) reads in genes were counted using Rsubread (2.0.0) (4). Differential expression analysis was conducted using DESeq2 (1.24.0) (5). MA plots were generated with ggplot2 (3.3.3) and the heatmaps using pheatmap (1.0.12) (6).

### Chromatin Immunoprecipitation Sequencing

Libraries were sequenced on the Illumina HiSeq2500 v4 at single read 50bp or on the Illumina NovaSeq 6000 SP1 at paired-end 50bp aiming for a sequencing depth of 20 - 40 million reads/sample. Raw reads were trimmed with CUTADAPT (2.8) and aligned to the human reference genome GRCh38 with bowtie 2 (2.3.5.1) (7). Alignments were further processed using samtools (1.10). Peaks were called using MACS2 (2.2.7.1) with default parameters taking uniquely mapped reads with a merged input as the control for MSX2 ChIPseq, while separate replicated inputs were used for ARID1A, BRG1, H3K27ac, H3K27me3 and H3K9me3 ChIPseq (8). For paired-end sequencing the software was run in paired-end mode. High confidence peaks were generated by IDR (1.2), using a cut-off of  $FDR < 0.05$  across all replicates via the ChIPpeakAnno package (3.26.0) (9, 10). Overlaps between ChIPseq peaks were computed by findOverlapsOfPeaks and makeVennDiagram. For visualization we generated RPKM normalized coverage files for MSX2, ARID1A and SMARCA4 with deeptools (3.5.0) and bamCoverage (11), while ChIPseq data for histone modifications were additionally normalized by drosophila spike-in reads (1). ChIPseq tracks were visualized using Galaxy and UCSC genome browser custom tracks (11, 12).

### Integration of ChIPseq and Quantseq data

Feature distribution was determined, and peaks were annotated with ChIPseeker (1.26.0) with following priorities: Promoter, 5'UTR, 3'UTR, Exon, Intron, Downstream, Intergenic (9). Gene symbols were retrieved using biomaRt (13) and gene overlaps between ChIPseq and/or Quantseq data were plotted using Eulerr (6.1.0) or UpSetR (1.4.0) (14, 15). After extraction of specific gene sets functional enrichment analysis was conducted as described below.

#### Differential ChIP enrichment analysis

Differential ChIP enrichment analysis was done using DiffBind (3.2.3) (16). All MSX2 peaks found in at least one replicate were considered, i.e. reads for each ChIP-seq (ARID1A, SMARCA4 and H3K27ac) were counted within a 400 bp window around MSX2 peaks. Correlation heatmaps of reads in ChIP-seq peaks were generated using DiffBind considering all peaks found in at least one sample. MA plots showing differential enrichment of ChIP-seq signals were constructed using the internal DiffBind function.

#### Functional Enrichment Analysis

GREAT analysis was conducted via the GREAT webpage (17) and visualized using ggplot2 (18). EnrichR analysis (19–21) was run on genes annotated by ChIPseeker or gene sets from Quantseq overlaps and visualized using custom R scripts. If not stated otherwise, P-values of enrichment analyses were BH adjusted and only terms with an adjusted P-value < 0.05 were considered.

#### **Genetic modifications**

To deplete MSX2, we generated pLKO.1-based constructs containing either shRNA against MSX2 (TRCN0000234848 and TRCN0000234849) or a shRNA against GFP as a control by cloning annealed oligos into the AgeI/EcoRI sites of pLKO.1-neo (13425, Addgene). The following plasmids were simultaneously transfected into HEK293T cells: pLKO.1 (individual constructs containing different shRNA), psPAX2 (encodes Gag and Pol sequences to package the lentivirus), and pMD2.G (encodes the G protein envelope protein) using lipofectamine 3000 (Thermo Fisher Scientific). Supernatant was collected after 48h and used to transduce hTSC for a minimum of 16h. Cells were selected using 300 µg/ml G418 (A1720, Sigma).

### **Cell culture conditions**

Briefly, the hTSCs were cultured in the basal media (DMEM/F12 (11320074, Thermo Fisher), 1x ITS-X (51500056, Thermo Fisher), 0.2% FBS (PAA), 1.5 µg/mL L-ascorbic acid (A4403, Sigma)) supplemented with 2 µM CHIR99021 (2520691, Peprotech), 50ng/mL EGF (AF-100-15, Peprotech), 0.5 µM A83-01 (9094360, Peprotech), and 5µM Y27632 (1293823, Peprotech), on dishes coated with 10µg/ml Fibronectin (FC0101, Sigma). Cells were passaged every 3-4 days using TrypLE (12605036, Thermo Scientific). ST differentiation was induced in basal medium supplemented with 2 µM Forskolin (6652995, Peprotech), 5 µM Y27632 and 4% KnockOut Serum Replacement (10828010, Thermo Scientific).

### **Mass Spectrometry**

Liquid Chromatography mass spectrometry (LC-MS) was performed on an UltiMate 3000 RSLC nano system (Thermo Scientific) coupled to a Q Exactive HF-X mass spectrometer (Thermo Scientific) and equipped with a Nanospray Flex Ion Source (Thermo Scientific). For peptide identification, the RAW-files were processed using Proteome Discoverer (2.3.0.523) (Thermo Scientific). The MS/MS spectra were searched against the Uniprot human proteome database 2020-10-12 (20,536 sequences; 11,395,384 residues) and the default list of common contaminants using MS Amanda (v2.0.0.12368) (12). Beta-methylthiolation on cysteine was set as a fixed modification. Localization of post-translational modification sites within the peptides was performed using the function ptmRS of phospho-RS (13). The maximal number of missed cleavages was set to 2, using tryptic enzymatic specificity. The results were filtered to 1 % FDR on the protein level using the Percolator algorithm integrated in Proteome Discoverer. Peptide areas were quantified using apQuant (14).

### **Primer sequences**

#### **RTQPCR**

*hPBGD-1F* GGAGCCATGTCTGGTAACGG

*hPBGD-1R* CCACGCGAATCACTCTCATCT

*hMSX2-1F* GCAGGAACCCGGCCGATATT

*hMSX2-1R* CTGACGGA~~ACTT~~GCGCTCCA  
*hCGB-F* CAGCATCCTATCACCTCCTGGT  
*hCGB-R* CTGGAACATCTCCATCCTTGGT  
*hGCM1-1F* GCTGGGACTTGAACCAGCAGT  
*hGCM1-1R* CTGGATCGGCCCACTCAAGC  
*hSDC1\_F* CTATTCCCACGTCTCCAGAACC  
*hSDC1\_R* GGACTACAGCCTCTCCCTCCTT  
*ERVW-1\_1F* CTACCCCAACTGCGGTTAAA  
*ERVW-1\_1R* GGTTCC~~TTT~~GGCAGTATCCA  
*hTEAD4\_F* GCCAGTCCAGCCCAAGCTAC  
*hTEAD4\_R* CATTGGAGGGTCCCCGTTCG

**shRNAs**

*CTRL* GCAAGCTGACCCTGAAGTTCAT  
*MSX2\_KD1* AGCGCAAGTTCCGTCAGAAAC  
*MSX2\_KD2* TGCAGGCAGCGTCCATATATG

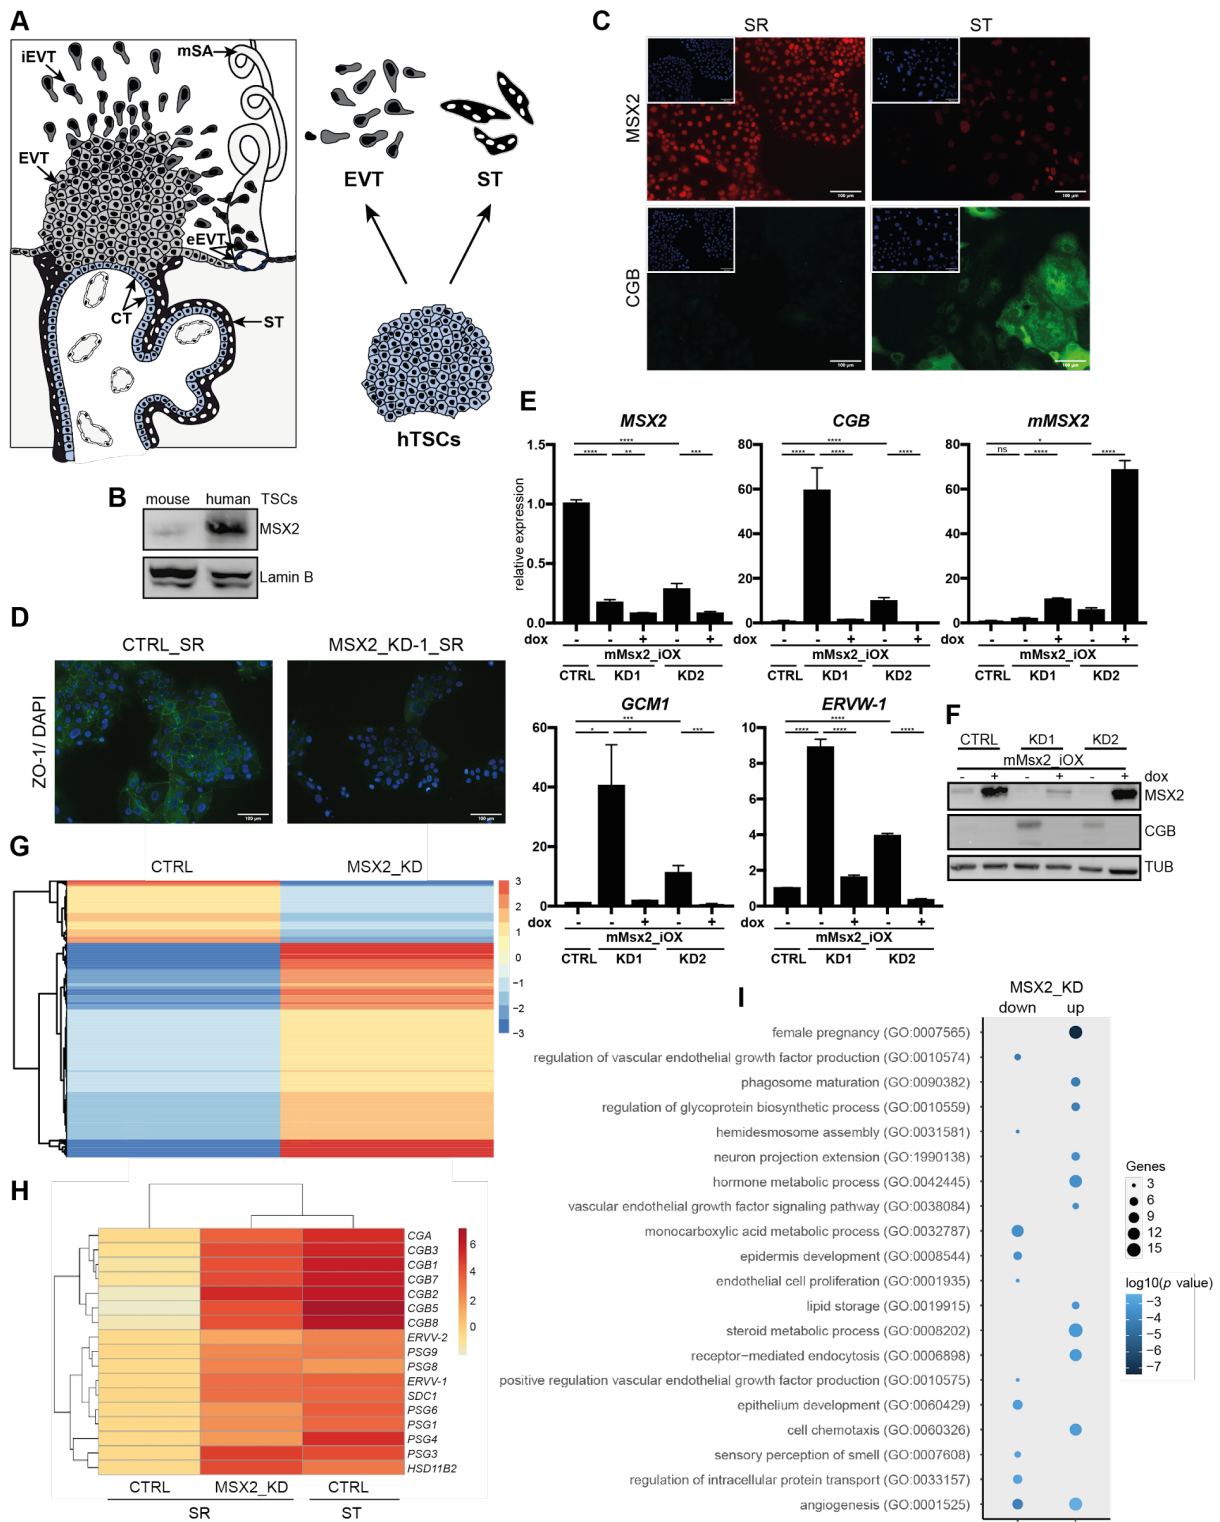



## Supplemental Figure S1

Depletion of MSX2 results in loss of silencing of syncytiotrophoblast genes.

(A) Schematic representation of a fragment of a villous tree in human placenta with main trophoblast cell types marked and their *in vitro* counterpart derivatives. EVT: extravillous trophoblast, iEVT: interstitial EVT, eEVT: endovascular EVT, ST: syncytiotrophoblast, CT: cytotrophoblast, mSA: maternal spiral artery, hTSCs: human trophoblast stem cells.

(B) Western blot analysis for MSX2 in mouse and human trophoblast stem cells. Lamin B serves as loading control.

(C) Immunostaining of self-renewing (SR) and 3 day syncytiotrophoblast differentiated (ST) hTSCs for MSX2 and CGB. DAPI (insets) indicates nuclei.

(D) Immunostaining for ZO-1 of MSX2-depleted (MSX2\_KD-1\_SR) and control (CTRL) cells cultured in self-renewal (SR) conditions. DAPI indicates nuclei.

(E) RTQPCR analysis of control (CTRL) and MSX2-depleted (KD1 and KD2) hTSCs carrying a doxycycline (dox) inducible mouse *Msx2* transgene (m*Msx2*\_iOX) and cultured in self-renewal conditions in the presence (+dox) or absence (-dox) of dox. The bars represent a mean of three biological replicates (n=3) with S.E.M., expression in CTRL was set to 1. \*\*\*\*p<0.0001, \*\*\*p<0.001, \*\*p<0.01, \*p<0.05, ns: not significant. MSX2 indicates expression of the human, endogenous MSX2, while m*Msx2* of the mouse *Msx2* transgene.

(F) Western blot analysis for CGB and MSX2 of control (CTRL) and MSX2-depleted (KD1 and KD2) hTSCs carrying a doxycycline (dox) inducible mouse *Msx2* transgene (m*Msx2*\_iOX), cultured in self-renewal conditions in the presence (+dox) or absence (-dox) of dox. Tubulin (TUB) serves as a loading control.

(G) Hierarchical clustering of genome-wide RNA profiles of MSX2-depleted (MSX2\_KD: MSX2\_KD1 (n=3) and MSX2\_KD2 (n=1)) and control (CTRL (n=3) hTSCs cultured in self-renewal conditions. Analysis ( $|\log_2FC| > 1$ ,  $p_{adj} < 0.05$ ) revealed 522 up-regulated and 152 down-regulated genes in MSX2\_KD lines compared to control.

(H) Clustered heat map depicting expression of selected syncytiotrophoblast markers in control (CTRL) and MSX2-depleted (MSX2\_KD) hTSC lines cultured in self-renewal

conditions (SR) (details as in A.) and, as comparison, in cells differentiated for 6 days to syncytiotrophoblast (ST).

(I) Gene Ontology (GO) term enrichment for biological processes of de-regulated genes in MSX2\_KD compared to control (CTRL), based on RNA-Seq analysis as in Supplemental Fig.1G.

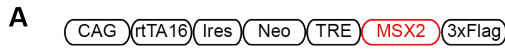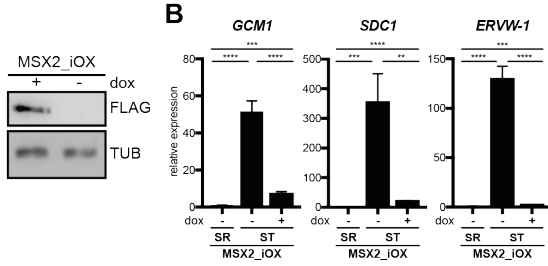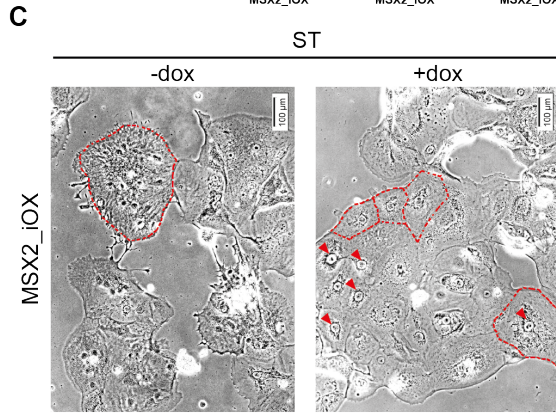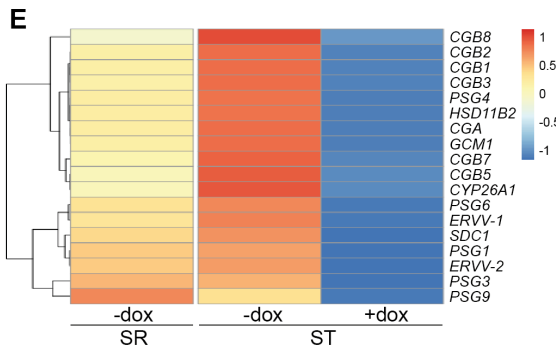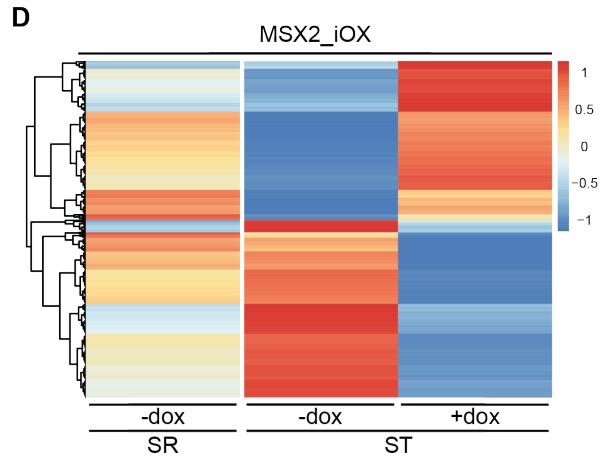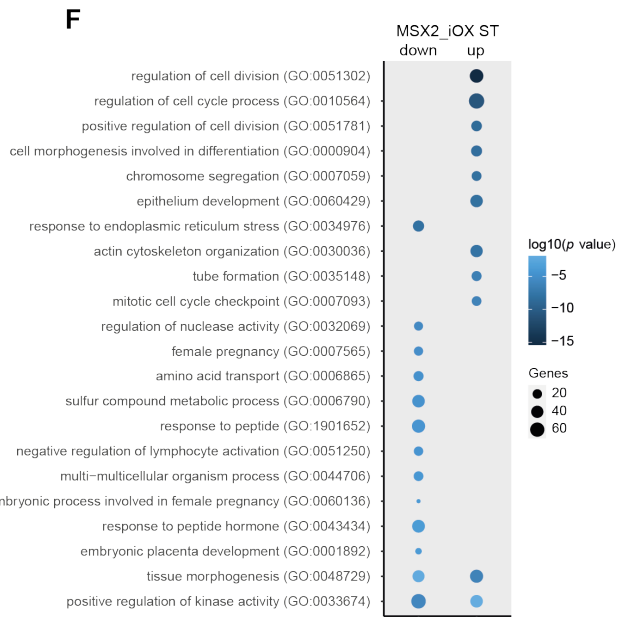

## Supplemental Figure S2

Ectopic expression of MSX2 blocks syncytiotrophoblast cell fate.

(A) Schematic depiction of a doxycycline (dox) inducible construct carrying a 3xFlag-tagged coding sequence of human MSX2 and a Western blot showing expression of this transgene upon 48h of dox treatment.

(B) RTQPCR analysis for syncytiotrophoblast markers *GCM1*, *SDC1* and *ERVW-1* in hTSC line carrying a dox inducible MSX2 transgene and differentiated to syncytiotrophoblast (ST) in the presence (+dox) or absence (-dox) of dox. The bars represent an average of three independent biological replicates (n=3) with S.E.M.; expression in self-renewal conditions (SR) was set to 1. \*\*\*\*p<0.0001, \*\*\*p<0.001, \*\*p<0.01, \*p<0.05, ns: not significant.

(C) Bright field images of hTSCs carrying a doxycycline (dox) inducible MSX2 transgene (MSX2\_iOX) differentiated for 6 days into syncytiotrophoblast (ST) in the presence (+dox) or absence (-dox) of dox. The red, dashed lines indicate syncytium (left panel) and single cells (right panel); arrowheads indicate enlarged nuclei (right panel).

(D) Hierarchical clustering of genome-wide expression profiles of hTSC carrying a doxycycline (dox) inducible MSX2 transgene (MSX2\_iOX) differentiated for 6 days into syncytiotrophoblast (ST) in the presence (+dox) or absence (-dox) of doxycycline. Analysis ( $|\log_2FC|>1$ ,  $p_{adj}<0.05$ ) revealed 1285 up-regulated and 1433 down-regulated genes in MSX2\_iOX (+dox) compared to (-dox) control. For comparison, levels of these differentially expressed genes in -dox, self-renewal conditions (SR) are displayed.

(E) Clustered heat map depicting expression of selected ST markers as in Supplemental Fig. S2D.

(F) Gene Ontology (GO) term enrichment for biological processes of de-regulated genes in MSX2\_iOX ST (+dox) in comparison to MSX2\_iOX ST (-dox), based on RNA-Seq analysis as in Supplemental Fig. S2D.

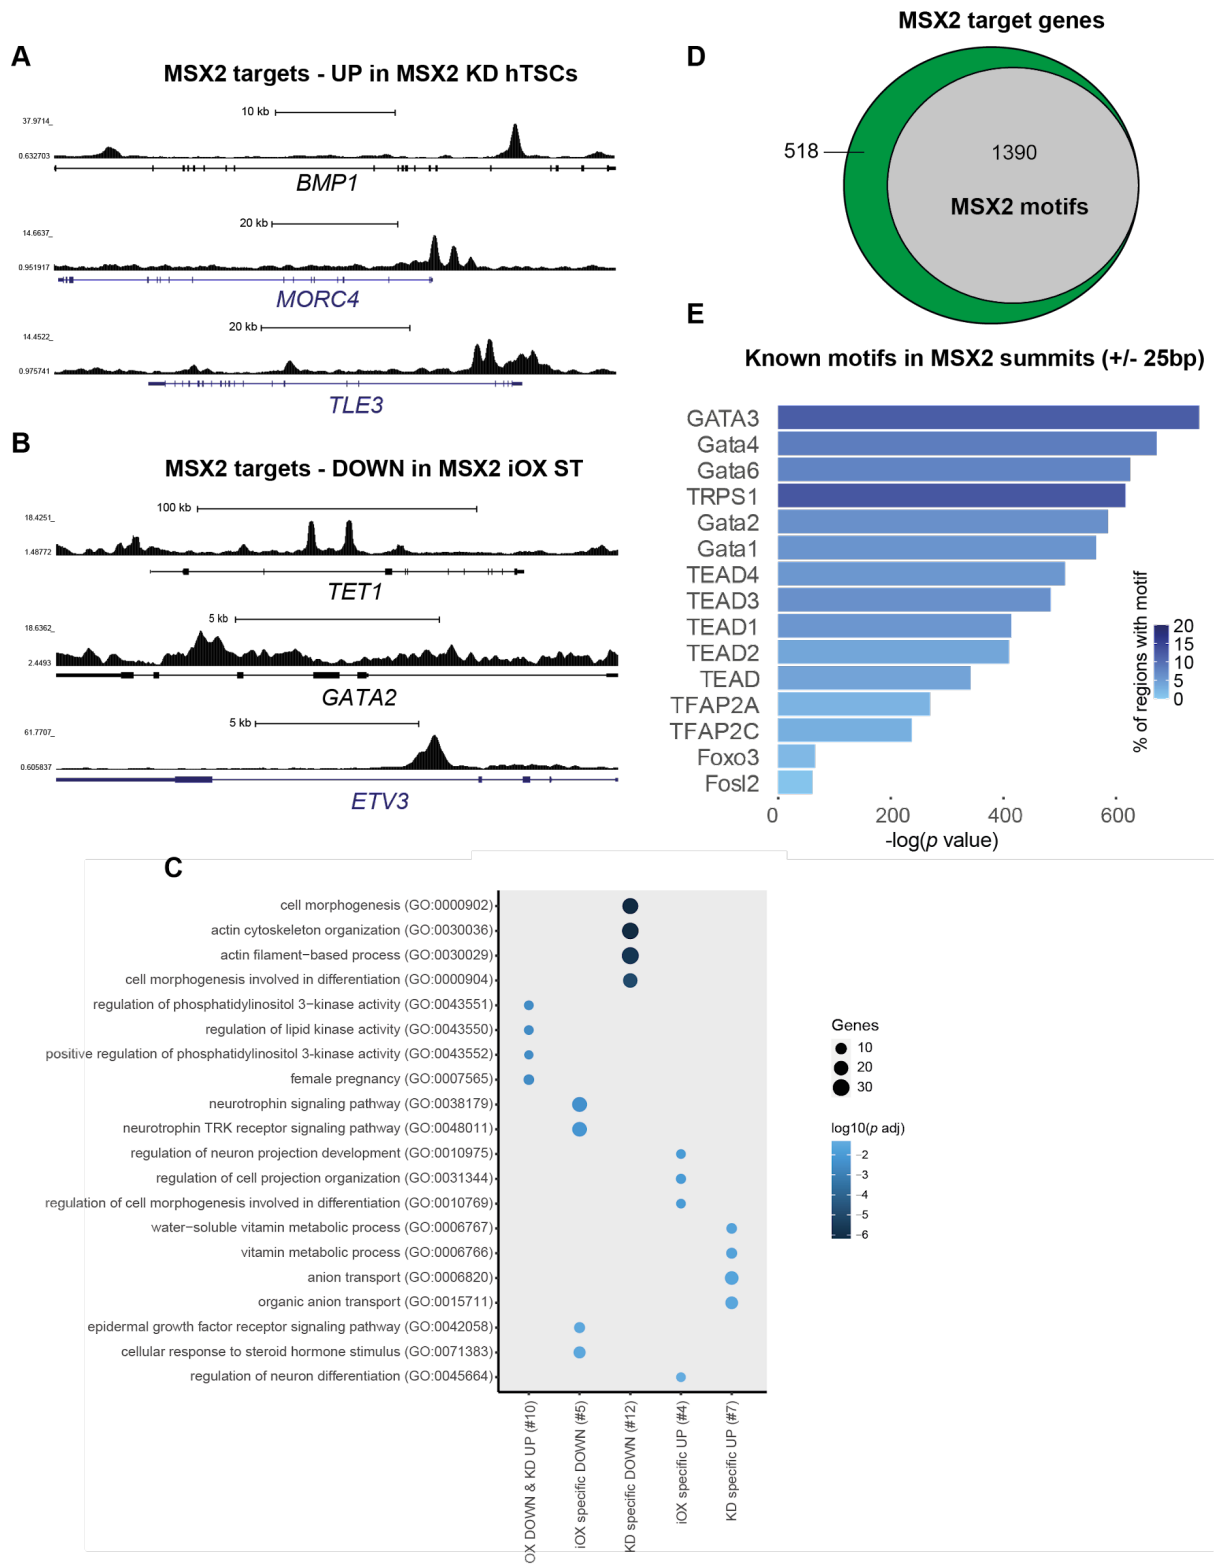

### Supplemental Figure S3

MSX2 binds the syncytiotrophoblast genes in hTSCs.

(A) Genome browser snapshots for MSX2 targets identified among the upregulated genes in hTSCs upon MSX2\_KD.

(B) Genome browser snapshots for MSX2 targets identified among the downregulated genes in ST upon MSX2 overexpression (MSX2\_iOX ST).

(C) Gene Ontology (GO) term enrichment of specific groups of MSX2 target genes derived from the UpSet plot in Fig. 3C. #10, genes that were conversely misregulated in MSX2\_KD hTSCs and MSX2\_iOX STs; #5, genes that were only downregulated in MSX2\_iOX STs but not significantly regulated in MSX2\_KD hTSCs; #12, genes that were only downregulated in MSX2\_KD hTSCs but not significantly regulated in MSX2\_iOX STs; #4, genes that were only upregulated in MSX2\_iOX STs but not significantly regulated in MSX2\_KD hTSCs and #7, genes that were only upregulated in MSX2 KD hTSCs but not significantly regulated in MSX2\_iOX STs.

(D) Number of MSX2 target genes with the MSX2 motif, identified by HOMER *de novo* motif detection. Total targets, blue; MSX2 motif containing targets, grey.

(E) Bar graph showing the identified known TF motifs around the MSX2 peak summits. The bar length represents  $-\log(p \text{ value})$  of enrichment and the colour scale indicates percentage of regions containing the respective TF motif.

A

| Gene    | Alias   | log2FC | p-value  | MSX2              |    |    |            |      |      | IgG               |   |   |            |     |     |
|---------|---------|--------|----------|-------------------|----|----|------------|------|------|-------------------|---|---|------------|-----|-----|
|         |         |        |          | # unique peptides |    |    | % coverage |      |      | # unique peptides |   |   | % coverage |     |     |
| MSX2    | MSX2    | 8.95   | 6.33E-07 | 3                 | 3  | 2  | 22.5       | 22.1 | 16.9 | 0                 | 0 | 0 | 0.0        | 0.0 | 0.0 |
| SMARCE1 | BAF57   | 7.36   | 3.28E-06 | 10                | 10 | 11 | 28.7       | 26.5 | 32.9 | 0                 | 0 | 0 | 0.0        | 0.0 | 0.0 |
| SMARCC2 | BAF170  | 7.33   | 3.97E-06 | 21                | 23 | 20 | 25.6       | 28.6 | 24.1 | 3                 | 4 | 0 | 2.6        | 3.5 | 0.0 |
| SMARCC1 | BAF155  | 7.18   | 2.59E-05 | 23                | 31 | 31 | 34.3       | 37.5 | 35.5 | 0                 | 2 | 0 | 1.7        | 4.9 | 0.0 |
| ARID1A  | BAF250A | 7.10   | 7.10E-06 | 31                | 31 | 42 | 20.1       | 20.0 | 24.6 | 0                 | 1 | 0 | 0.0        | 0.0 | 0.0 |
| SMARCD2 | BAF60B  | 6.95   | 4.45E-06 | 18                | 13 | 15 | 43.9       | 34.3 | 38.4 | 0                 | 0 | 0 | 0.0        | 0.0 | 0.0 |
| SMARCA4 | BRG1    | 6.85   | 7.48E-06 | 12                | 17 | 20 | 16.8       | 20.3 | 19.7 | 0                 | 0 | 0 | 0.0        | 0.0 | 0.0 |
| SMARCB1 | BAF47   | 6.78   | 5.76E-06 | 11                | 12 | 7  | 33.5       | 42.1 | 27.5 | 0                 | 0 | 0 | 0.0        | 0.0 | 0.0 |
| ACTL6A  | BAF53A  | 6.47   | 8.01E-06 | 11                | 11 | 9  | 32.4       | 37.5 | 25.4 | 0                 | 0 | 0 | 0.0        | 0.0 | 0.0 |
| DPF2    | BAF45D  | 6.27   | 1.79E-05 | 8                 | 8  | 11 | 23.0       | 31.0 | 32.5 | 0                 | 0 | 0 | 0.0        | 0.0 | 0.0 |
| SMARCA2 | BRM     | 4.44   | 1.66E-04 | 9                 | 10 | 9  | 16.0       | 15.6 | 13.3 | 0                 | 0 | 0 | 0.0        | 0.0 | 0.0 |
| SMARCD1 | BAF60A  | 4.74   | 9.02E-05 | 9                 | 10 | 9  | 23.9       | 28.2 | 24.3 | 0                 | 0 | 0 | 0.0        | 0.0 | 0.0 |

B

| Gene    | Alias   | log2FC | p value  | ARID1A            |    |     |            |      |      | IgG               |   |   |            |     |      |
|---------|---------|--------|----------|-------------------|----|-----|------------|------|------|-------------------|---|---|------------|-----|------|
|         |         |        |          | # unique peptides |    |     | % coverage |      |      | # unique peptides |   |   | % coverage |     |      |
| ARID1A  | BAF250A | 10.71  | 1.72E-04 | 48                | 99 | 114 | 28.1       | 34.1 | 36.1 | 0                 | 0 | 0 | 0.0        | 0.0 | 0.0  |
| SMARCC1 | BAF155  | 9.56   | 2.47E-05 | 25                | 41 | 35  | 32.3       | 40.0 | 34.9 | 8                 | 3 | 9 | 12.6       | 5.7 | 15.6 |
| DPF2    | BAF45D  | 7.75   | 1.08E-04 | 7                 | 13 | 11  | 23.0       | 36.8 | 34.8 | 0                 | 0 | 0 | 0.0        | 0.0 | 0.0  |
| SMARCE1 | BAF57   | 7.66   | 1.72E-04 | 9                 | 13 | 20  | 28.0       | 38.2 | 45.5 | 1                 | 0 | 0 | 2.4        | 0.0 | 0.0  |
| SMARCD2 | BAF60B  | 7.40   | 1.37E-04 | 9                 | 12 | 14  | 22.8       | 21.1 | 25.2 | 1                 | 1 | 1 | 1.9        | 1.9 | 1.9  |
| SMARCC2 | BAF170  | 7.38   | 4.17E-04 | 13                | 18 | 29  | 19.4       | 23.0 | 27.7 | 4                 | 1 | 4 | 5.5        | 2.7 | 6.3  |
| SMARCB1 | BAF47   | 6.54   | 1.07E-04 | 7                 | 6  | 9   | 17.9       | 20.8 | 19.0 | 2                 | 0 | 1 | 5.7        | 0.0 | 3.4  |
| SMARCA2 | BRM     | 5.74   | 1.42E-03 | 11                | 17 | 18  | 11.1       | 15.2 | 17.2 | 5                 | 3 | 1 | 6.7        | 3.6 | 2.2  |
| ACTL6A  | BAF53A  | 3.79   | 3.96E-02 | 5                 | 14 | 14  | 14.7       | 29.4 | 26.8 | 4                 | 1 | 1 | 14.7       | 2.3 | 3.0  |

C

| Gene    | Alias   | log2FC | p value    | BRG1              |    |    |            |      |      | IgG               |   |   |            |     |      |
|---------|---------|--------|------------|-------------------|----|----|------------|------|------|-------------------|---|---|------------|-----|------|
|         |         |        |            | # unique peptides |    |    | % coverage |      |      | # unique peptides |   |   | % coverage |     |      |
| SMARCC1 | BAF155  | 11.6   | 5.6671E-06 | 37                | 47 | 27 | 45.4       | 45.2 | 27.2 | 8                 | 3 | 9 | 12.6       | 5.7 | 15.6 |
| SMARCA4 | BRG1    | 11.5   | 2.0959E-05 | 30                | 48 | 47 | 32.0       | 32.2 | 26.7 | 0                 | 0 | 1 | 2.6        | 0.7 | 2.2  |
| SS18    |         | 9.9    | 0.00010526 | 3                 | 7  | 3  | 7.2        | 12.4 | 4.8  | 1                 | 0 | 0 | 4.3        | 0.0 | 0.0  |
| DPF2    | BAF45D  | 9.8    | 8.4602E-06 | 10                | 15 | 9  | 35.3       | 41.2 | 18.7 | 0                 | 0 | 0 | 0.0        | 0.0 | 0.0  |
| SMARCC2 | BAF170  | 9.7    | 3.0104E-05 | 23                | 47 | 23 | 26.1       | 41.5 | 20.3 | 4                 | 1 | 4 | 5.5        | 2.7 | 6.3  |
| SMARCE1 | BAF57   | 9.6    | 2.9191E-05 | 17                | 21 | 14 | 41.6       | 45.3 | 31.6 | 1                 | 0 | 0 | 2.4        | 0.0 | 0.0  |
| ACTL6A  | BAF53A  | 9.4    | 3.5801E-05 | 15                | 18 | 14 | 40.8       | 36.8 | 25.2 | 4                 | 1 | 1 | 14.7       | 2.3 | 3.0  |
| SMARCD2 | BAF60B  | 9.1    | 2.1762E-05 | 17                | 18 | 10 | 42.7       | 42.4 | 22.0 | 1                 | 1 | 1 | 1.9        | 1.9 | 1.9  |
| SMARCB1 | BAF47   | 9.1    | 2.746E-05  | 9                 | 9  | 8  | 22.9       | 27.8 | 18.4 | 2                 | 0 | 1 | 5.7        | 0.0 | 3.4  |
| ARID2   | BAF200  | 7.7    | 0.00048737 | 9                 | 17 | 10 | 7.0        | 13.5 | 5.6  | 1                 | 1 | 1 | 0.5        | 0.5 | 0.5  |
| BCL7B   |         | 7.1    | 0.00077619 | 0                 | 5  | 0  | 5.0        | 27.7 | 5.0  | 0                 | 0 | 0 | 0.0        | 0.0 | 0.0  |
| SMARCD1 | BAF60A  | 6.9    | 0.0007143  | 8                 | 10 | 8  | 27.8       | 27.8 | 20.8 | 0                 | 0 | 0 | 0.0        | 0.0 | 0.0  |
| PBRM1   | BAF180  | 6.6    | 0.00188292 | 9                 | 27 | 15 | 6.5        | 19.3 | 9.5  | 0                 | 0 | 0 | 0.0        | 0.0 | 0.0  |
| BCL7C   |         | 5.9    | 0.00122949 | 2                 | 1  | 2  | 18.4       | 12.9 | 18.4 | 0                 | 0 | 0 | 0.0        | 0.0 | 0.0  |
| BRD7    |         | 5.8    | 0.00114908 | 4                 | 9  | 6  | 10.1       | 20.7 | 12.3 | 0                 | 0 | 0 | 0.0        | 0.0 | 0.0  |
| PHF10   | BAF45A  | 5.4    | 0.00475248 | 3                 | 7  | 3  | 6.4        | 14.1 | 7.0  | 0                 | 0 | 0 | 0.0        | 0.0 | 0.0  |
| BRD9    |         | 5.4    | 0.00703802 | 2                 | 4  | 2  | 5.5        | 7.9  | 4.7  | 0                 | 0 | 0 | 0.0        | 0.0 | 0.0  |
| ARID1A  | BAF250A | 5.0    | 0.0001725  | 31                | 52 | 38 | 20.1       | 30.9 | 18.9 | 0                 | 0 | 0 | 0.0        | 0.0 | 0.0  |
| ARID1B  | BAF250B | 5.0    | 0.00035688 | 2                 | 9  | 4  | 2.1        | 6.0  | 2.2  | 0                 | 0 | 0 | 0.0        | 0.0 | 0.0  |
| DPF3    | BAF45C  | 4.0    | 0.03327768 | 3                 | 3  | 1  | 9.0        | 8.2  | 2.4  | 0                 | 0 | 0 | 0.0        | 0.0 | 0.0  |

D

| input | IP: |      | MSX2             |
|-------|-----|------|------------------|
|       | IgG | BRG1 |                  |
|       |     |      | SMARCA4 (BRG1)   |
|       |     |      | SMARCC2 (BAF170) |
|       |     |      | SMARCC1 (BAF155) |
|       |     |      | SMARCD2 (BAF60B) |
|       |     |      | SMARCB1 (BAF47)  |
|       |     |      | MSX2             |

**Supplemental Figure S4** MSX2 interacts with components of the cBAF complex.

(A) Details of anti-MSX2 rapid immunoprecipitation mass spectrometry of endogenous proteins (RIME) from Fig.4A.

(B) Details of anti-ARID1A RIME from Fig.4D.

(C) Details of anti-SMARCA4 RIME from Fig.4E.

(D) SMARCA4 immunoprecipitates analyzed by Western blot probed with anti-SMARCA4 (BRG1), anti-SMARCC2 (BAF170), anti-SMARCC1 (BAF155), anti-SMARCD2 (BAF60B), anti-SMARCB1 (BAF47), and anti-MSX2.



**A**

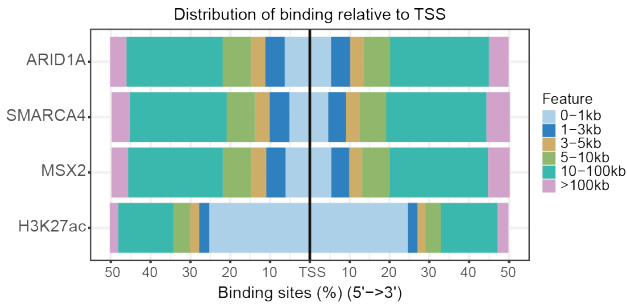

**B**

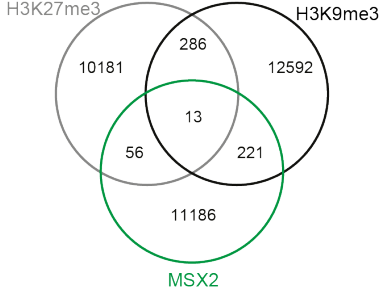

**C**

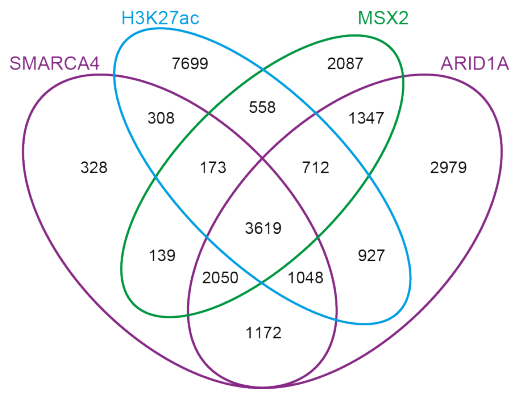

### **Supplemental Figure S5**

MSX2 and cBAF complex co-bind trophoblast genes marked by H3K27ac.

(A) Distribution of MSX2, ARID1A, SMARCA4 binding sites and regions marked by H3K27ac relative to transcription start sites (TSS).

(B) Venn diagram depicting overlap between regions bound by MSX2 and regions marked by H3K27me3 and H3K9me3.

(C) Venn diagram showing overlap between regions bound by MSX2, ARID1A, SMARCA4 and marked by H3K27ac.

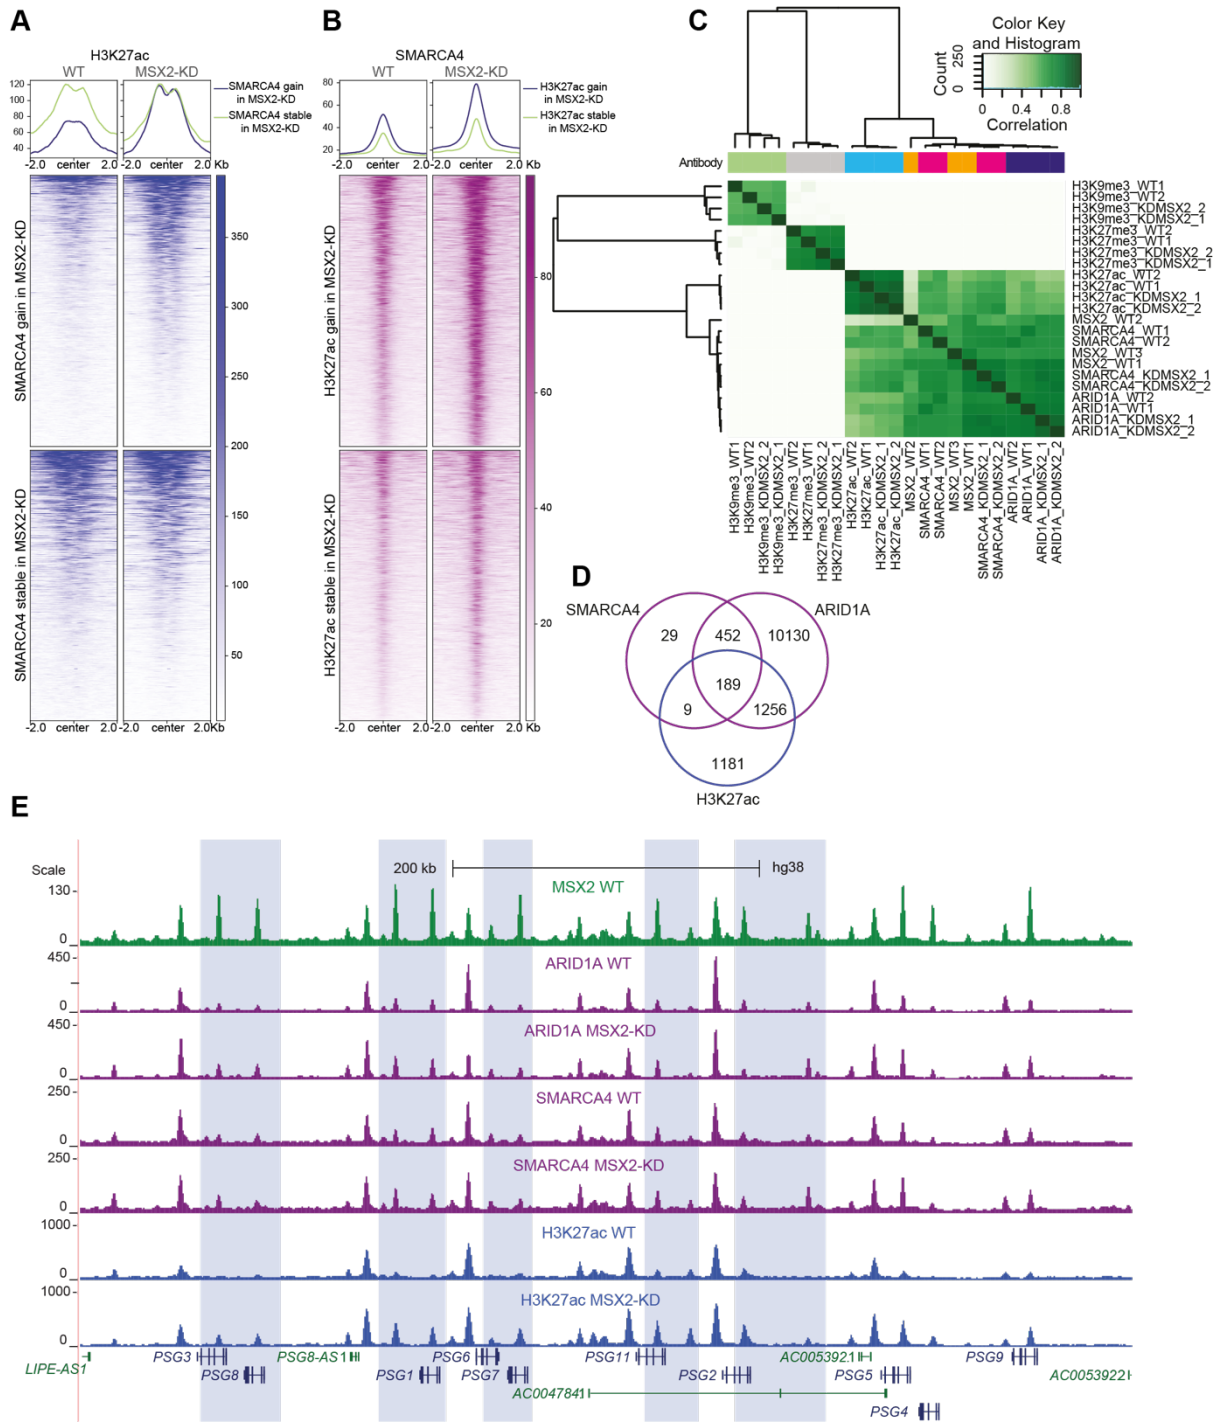

## Supplemental Figure S6

MSX2 depletion leads to increases in both cBAF occupation and H3K27ac.

(A) Heatmap and profile plot of H3K27ac ChIP-seq signal at MSX2 bound regions differentially enriched for SMARCA4 in MSX2-KD vs WT hTSCs and compared to an equally sized set of random MSX2 bound regions.

(B) Heatmap and profile plot of SMARCA4 ChIP-seq signal at MSX2 bound regions differentially enriched for H3K27ac in MSX2-KD vs WT hTSCs as determined in lower MA-plot in Fig 6A (top heatmap) and an equally sized set of random MSX2 bound regions (bottom heatmap).

(C) Correlation between MSX2, ARID1A, SMARCA4, H3K27ac, H3K27me3 and H3K9me3 signals in both WT and shMSX2 hTSCs based on counted reads considering all peaks detected in any of the 23 samples.

(D) Venn diagram depicting overlap between MSX2 binding sites, differentially enriched for ARID1A, SMARCA4 or H3K27ac in MSX2-KD vs WT.

(E) Genome browser tracks of MSX2, ARID1A, SMARCA4 and H3K27ac signal in WT and MSX2-KD hTSCs at the *PSG* gene cluster. MSX2: green, ARID1A and SMARCA4: purple, H3K27ac: blue. Differentially enriched H3K27ac regions are highlighted in light blue.

## SI References

1. B. Egan, *et al.*, An Alternative Approach to ChIP-Seq Normalization Enables Detection of Genome-Wide Changes in Histone H3 Lysine 27 Trimethylation upon EZH2 Inhibition. *PLoS One* **11**, e0166438 (2016).
2. S. Andrews, *FastQC: A quality control tool for high throughput sequence data*.
3. A. Dobin, *et al.*, STAR: ultrafast universal RNA-seq aligner. *Bioinformatics* **29**, 15–21 (2013).
4. Y. Liao, G. K. Smyth, W. Shi, The R package Rsubread is easier, faster, cheaper and better for alignment and quantification of RNA sequencing reads. *Nucleic Acids Res.* **47**, e47–e47 (2019).
5. M. I. Love, W. Huber, S. Anders, Moderated estimation of fold change and dispersion for RNA-seq data with DESeq2. *Genome Biol.* **15**, 550–21 (2014).
6. R. Kolde, *pheatmap: Pretty Heatmaps*.
7. B. Langmead, S. L. Salzberg, Fast gapped-read alignment with Bowtie 2. *Nat. Methods* **9**, 357–359 (2012).
8. Y. Zhang, *et al.*, Model-based analysis of ChIP-Seq (MACS). *Genome Biol.* **9**, R137-9 (2008).
9. K. Krismer, Y. Guo, D. K. Gifford, IDR2D identifies reproducible genomic interactions. *Nucleic Acids Res.* **48**, e31–e31 (2020).
10. L. J. Zhu, *et al.*, ChIPpeakAnno: a Bioconductor package to annotate ChIP-seq and ChIP-chip data. *BMC Bioinformatics* **11**, 237 (2010).
11. W. J. Kent, *et al.*, The human genome browser at UCSC. *Genome Res* **12**, 996–1006 (2002).
12. E. Afgan, *et al.*, The Galaxy platform for accessible, reproducible and collaborative biomedical analyses: 2018 update. *Nucleic Acids Res* **46**, W537–W544 (2018).
13. S. Durinck, *et al.*, BioMart and Bioconductor: a powerful link between biological databases and microarray data analysis. *Bioinformatics* **21**, 3439–3440 (2005).

14. J. R. Conway, A. Lex, N. Gehlenborg, UpSetR: an R package for the visualization of intersecting sets and their properties. *Bioinformatics* **33**, 2938–2940 (2017).
15. J. Larsson, *Area-Proportional Euler and Venn Diagrams with Ellipses*. (2020).
16. C. S. Ross-Innes, *et al.*, Differential oestrogen receptor binding is associated with clinical outcome in breast cancer. *Nature* **481**, 389–393 (2012).
17. M. Cy, *et al.*, GREAT improves functional interpretation of cis-regulatory regions. *Nature biotechnology* **28** (2010).
18. H. Wickham, *Elegant Graphics for Data Analysis* (Springer).
19. E. Y. Chen, *et al.*, Enrichr: interactive and collaborative HTML5 gene list enrichment analysis tool. *BMC Bioinformatics* **14**, 128 (2013).
20. M. V. Kuleshov, *et al.*, Enrichr: a comprehensive gene set enrichment analysis web server 2016 update. *Nucleic Acids Res* **44**, W90-97 (2016).
21. Z. Xie, *et al.*, Gene Set Knowledge Discovery with Enrichr. *Curr Protoc* **1**, e90 (2021).
